# Supplementary material for: Identification and Characterization of a Novel Cold-Adapted GH15 Family Trehalase from the Psychrotolerant Microbacterium phyllosphaerae LW106
Source: MDPI journal article supplement (doi:10.3390/fermentation8100471), 2022-09-21
Supplement: s1 [file s1]

Archive with 1 entries (1 files):
- fermentation-1893741-supplementary.pdf
